# Supplementary material for: Adaptation of Escherichia coli to Long-Term Serial Passage in Complex Medium: Evidence of Parallel Evolution
Source: PubMed Central journal article supplement (PMC5340864; doi:10.1128/msystems.00192-16), 2017-03-07
Supplement: sys002172093sf5.pdf [file sys002172093sf5.pdf]

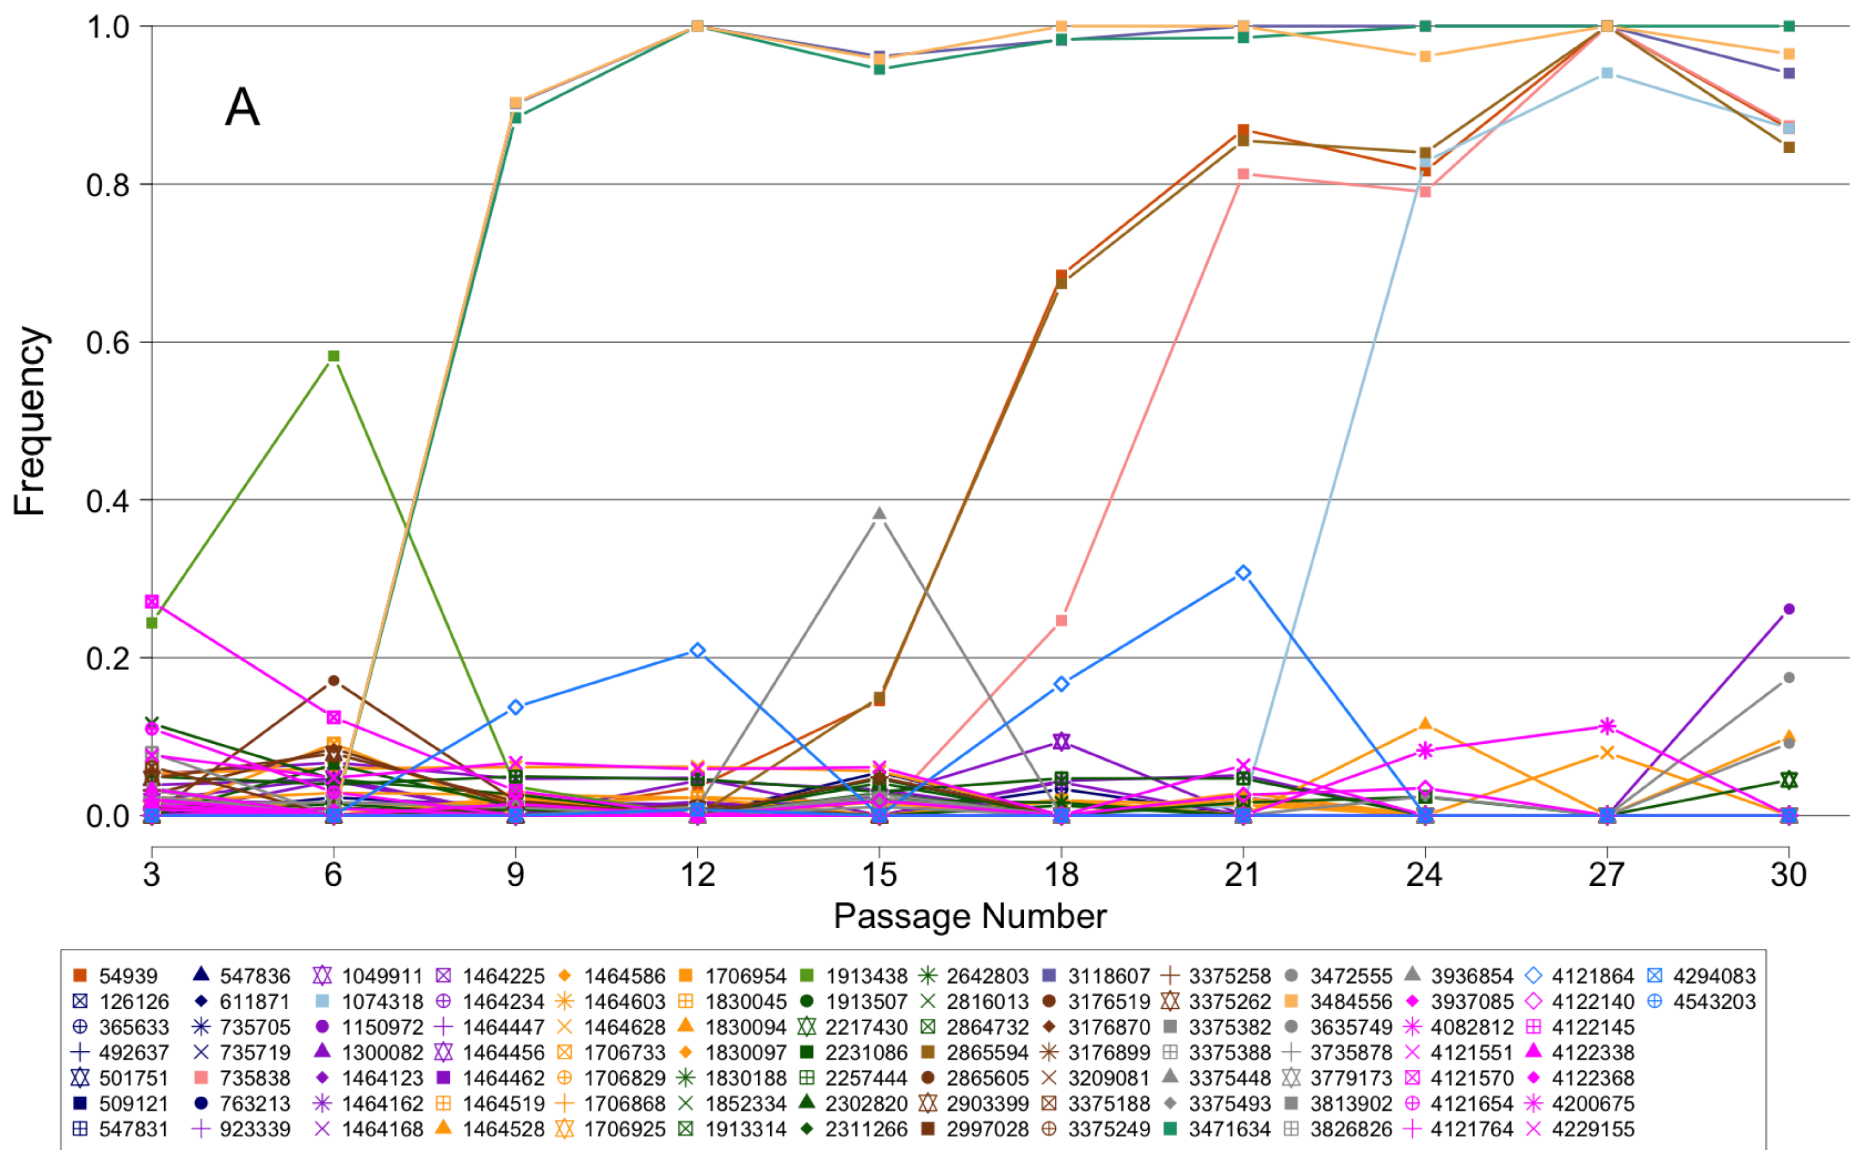

**Supplemental Figure 1A. Mutations from passaged populations.** Line graph of alleles in each of the three populations for each passage. Frequency was calculated by dividing the number of reads with a non-reference allele by the total number of reads for that nucleotide.

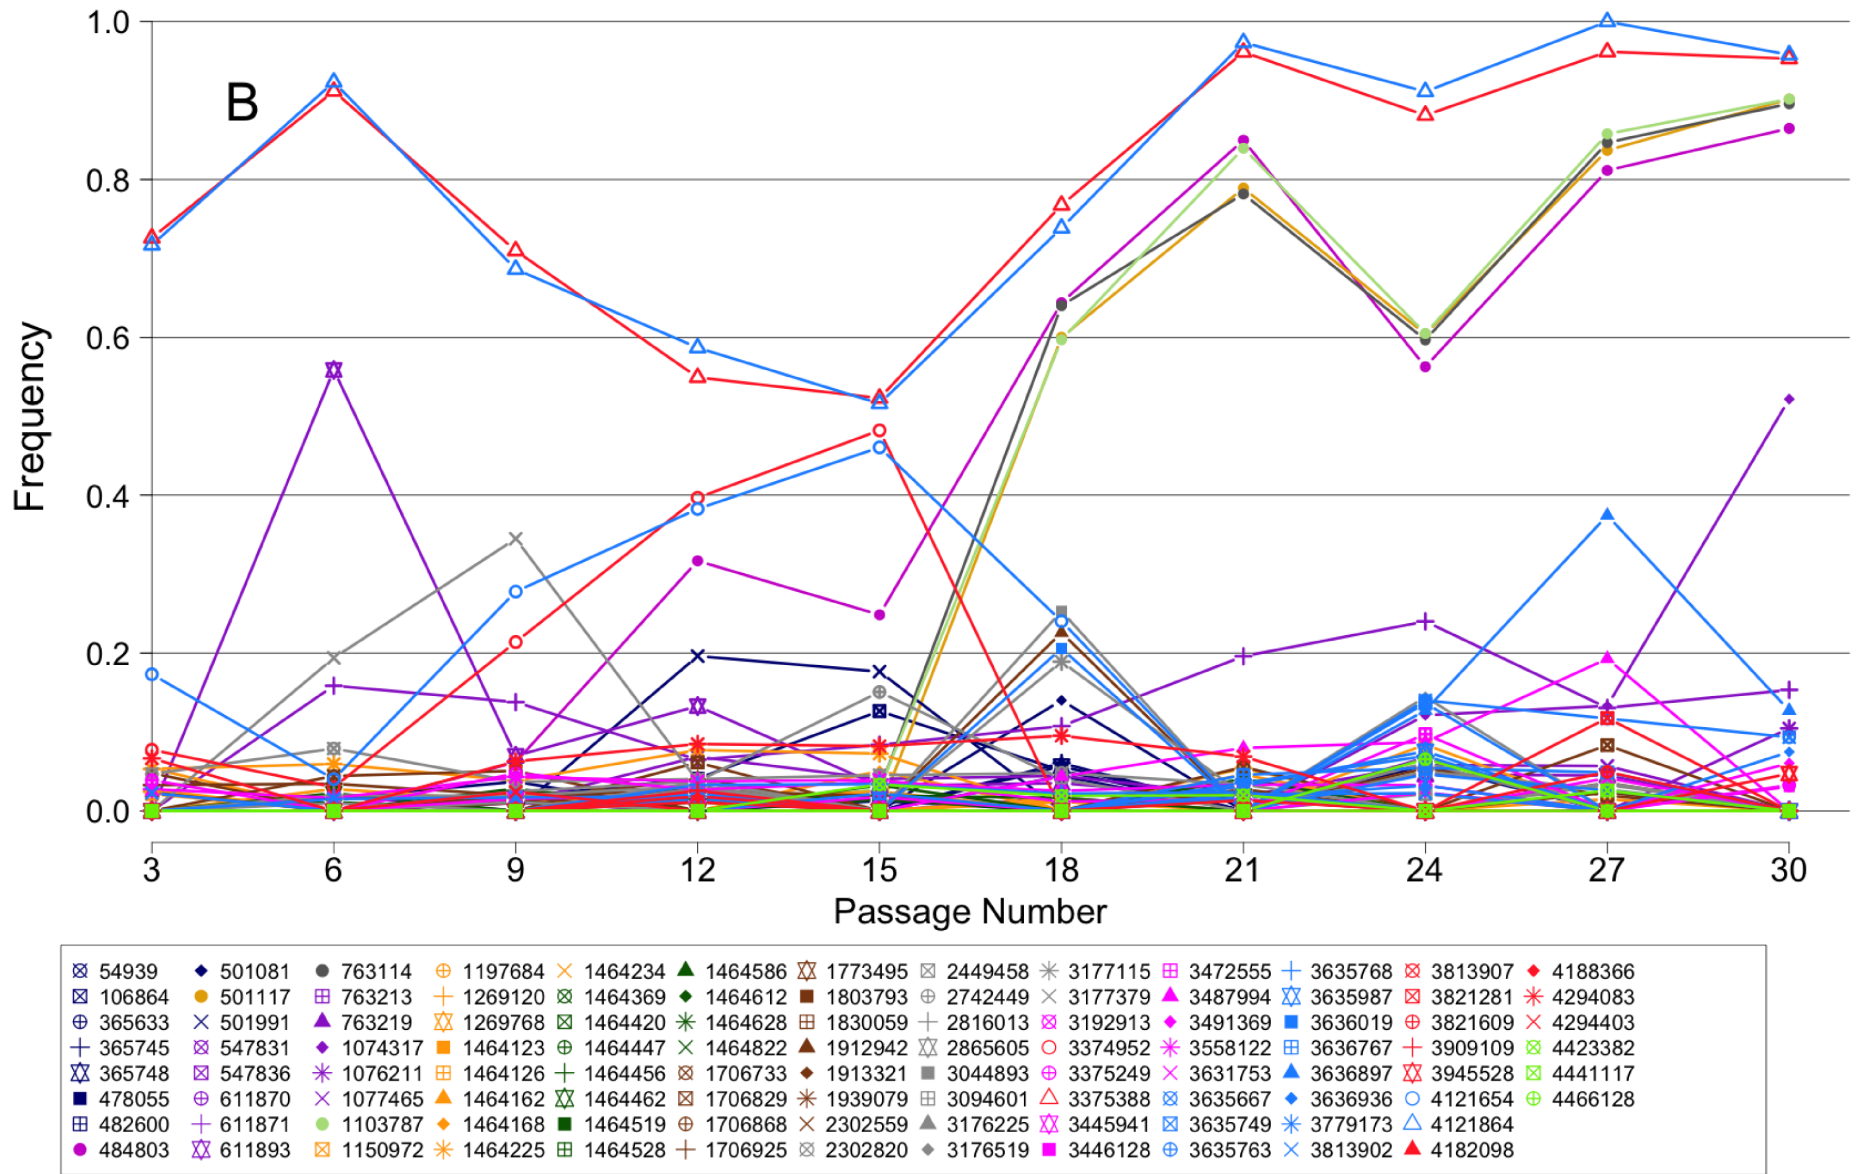

**Supplemental Figure 1B. Mutations from passaged populations.** Line graph of alleles in each of the three populations for each passage. Frequency was calculated by dividing the number of reads with a non-reference allele by the total number of reads for that nucleotide.

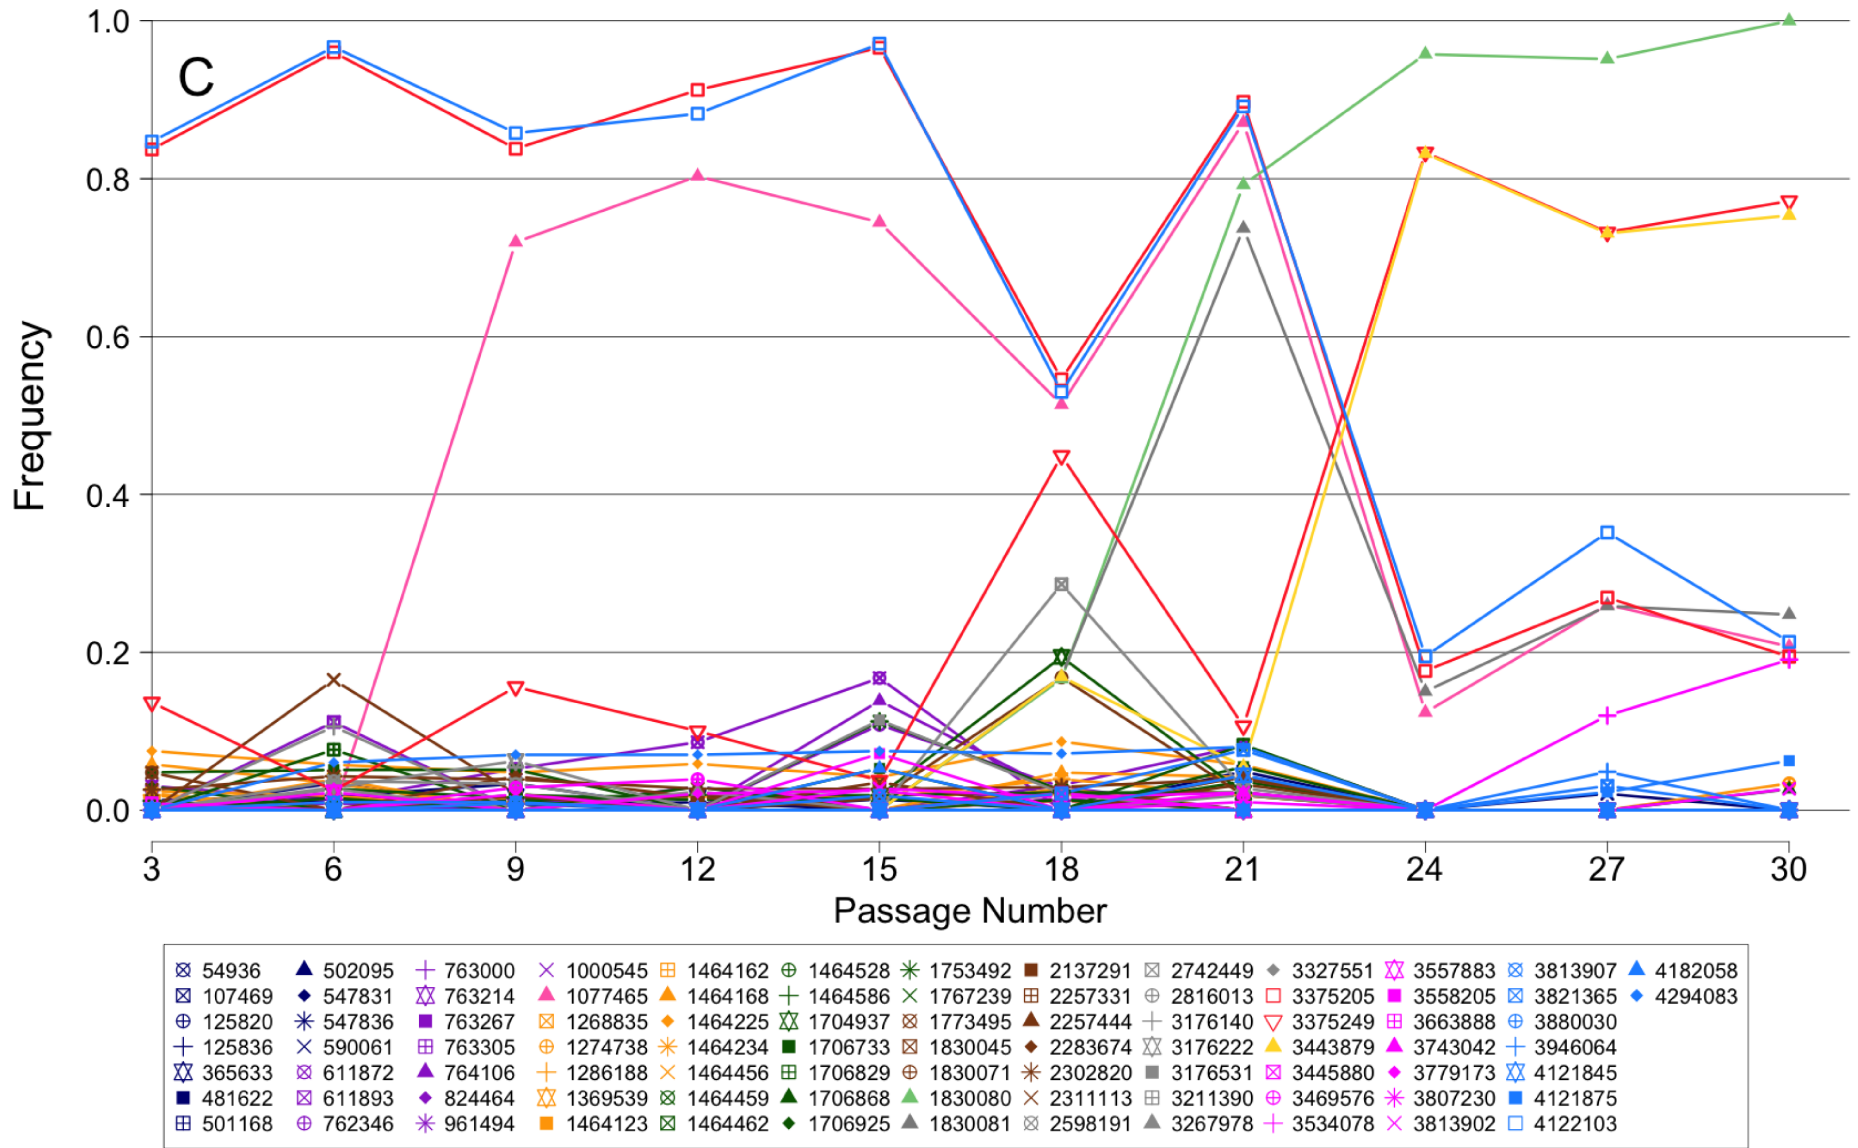

**Supplemental Figure 1C. Mutations from passaged populations.** Line graph of alleles in each of the three populations for each passage. Frequency was calculated by dividing the number of reads with a non-reference allele by the total number of reads for that nucleotide.
