# Supplementary material for: Adaptation of Escherichia coli to Long-Term Serial Passage in Complex Medium: Evidence of Parallel Evolution
Source: PubMed Central journal article supplement (PMC5340864; doi:10.1128/msystems.00192-16), 2017-03-07
Supplement: sys002172093st1.pdf [file sys002172093st1.pdf]

Supplemental Table 1. Time points with significant p-values ( $p \leq 0.025$ ) compared to unaged cells.

|         |    | Population |       |       |       |       |       |       |       |       |
|---------|----|------------|-------|-------|-------|-------|-------|-------|-------|-------|
|         |    | A          |       |       | B     |       |       | C     |       |       |
| Day:    |    | 3          | 4     | 5     | 3     | 4     | 5     | 3     | 4     | 5     |
| Passage | 3  |            |       | 0.016 | 0.019 | 0.014 | 0.002 | 0.013 | 0.023 | 0.006 |
|         | 6  |            |       | 0.003 | 0.021 | 0.020 | 0.003 | 0.012 |       |       |
|         | 9  | 0.024      | 0.008 | 0.004 | 0.014 | 0.002 |       | 0.013 | 0.002 |       |
|         | 12 |            |       |       |       |       | 0.023 | 0.014 |       |       |
|         | 15 |            |       |       | 0.021 | 0.003 | 0.012 | 0.015 | 0.003 | 0.017 |
|         | 18 |            | 0.012 |       | 0.020 | 0.010 |       |       | 0.005 |       |
|         | 21 |            | 0.009 |       |       | 0.004 |       | 0.014 | 0.005 | 0.011 |
|         | 24 | 0.023      | 0.005 | 0.013 | 0.021 | 0.009 | 0.003 | 0.015 | 0.008 |       |
|         | 27 | 0.025      | 0.008 |       | 0.019 | 0.004 |       | 0.013 | 0.014 | 0.003 |
|         | 30 | 0.017      | 0.004 |       | 0.021 | 0.008 | 0.025 | 0.021 | 0.008 | 0.006 |
